# Supplementary material for: Sleep disturbances and semen quality in an Italian cross sectional study
Source: PubMed Central journal article supplement (PMC5563907; doi:10.1186/s12610-017-0060-0), 2017-08-21
Supplement: 12610_2017_60_MOESM1_ESM.pdf [file 12610_2017_60_MOESM1_ESM.pdf]

COME DESCRIVEREBBE IL SUO LIVELLO DI ATTIVITA' FISICA ?

LAVORO/CASA

- 1 = MOLTO FATICOSA (muratore, atleta e ballerino professionisti)
- 2 = FATICOSA (agricoltore, operaio industria metalmeccanica, ecc.)
- 3 = MEDIA (rappresentante, cameriere, cuoco, maestra d'asilo,  
casalinga con lavori pesanti o bambini piccoli)
- 4 = IN PIEDI (commessa, insegnante, laboratorista, casalinga, lavori leggeri)
- 5 = ESCLUSIVAMENTE O PRINCIPALMENTE SEDUTA (impiegato d'ufficio, meccanico di  
precisione, studente)      /\_/\_/

SPORT TEMPO LIBERO, SPOSTAMENTI IN BICICLETTA

- 1 = > 7 ore alla settimana di attività fisica
- 2 = 5-7 ore alla settimana di attività fisica
- 3 = 2-4 ore alla settimana di attività fisica
- 4 = < 2 ore alla settimana di attività fisica      /\_/\_/

Peso

Peso (in Kg) / \_ / \_ / \_ /

Altezza (in cm) / \_ / \_ / \_ /

Consuma alcolici?

/1/ No /2/ Si

Se Sì indicare consumo medio in bicchieri die / \_ / \_ /

CARD 2

Anamnesi patologica

Studio

N° paziente  
caso/controllo  
N° card

Ha avuto le seguenti patologie?

Diabete mellito .....

Ipertensione (trattata con farmaci) .....

Varicocele.....

Orchite .....

Patologie della tiroide (specificare) .....

Interventi per torsione  
testicolare.....

Altro .....

QUESTIONARIO QUALITA' DEL SONNO

Le capita mai di avere disturbi del sonno? Si no

Con che frequenza? 1/mese 1/sett 3-4/ sett. Tutte le sere

Il suo problema riguarda una difficoltà:



1)CON CHE FREQUENZA LE CAPITANO QUESTE SENSAZIONI ?

MENO DI UNA VOLTA ALL'ANNO

SI

NO

PIU' DI UNA VOLTA ALL'ANNO MA MENO DI UNA VOLTA AL MESE

SI

NO

UNA VOLTA OGNI MESE

SI

NO

2-4 VOLTE AL MESE

SI

NO

2-3 VOLTE ALLA SETTIMANA

SI

NO

4-5 VOLTE ALLA SETTIMANA

SI

NO

6-7 VOLTE ALLA SETTIMANA

SI

NO
